# Supplementary material for: Synthesis of mesoporous γ-alumina nanorods using a double surfactant system by reverse microemulsion process
Source: Royal Society of Chemistry journal article supplement (doi:10.1039/c3ra22793f), 2013-01-01

## Supplementary Information

### **Synthesis of mesoporous $\gamma$ -alumina nanorod using a double surfactant system by reverse microemulsion process**

**Sourav Ghosh and Milan Kanti Naskar\***

Sol-Gel Division, CSIR-Central Glass and Ceramic Research Institute, Kolkata 700 032,  
India

Fig. 1S: XRD patterns of the powders calcined at 500°C for (a) 1h (b) 2h, (c) 3h and (d) 4h. •:  $\gamma$ - $\text{Al}_2\text{O}_3$

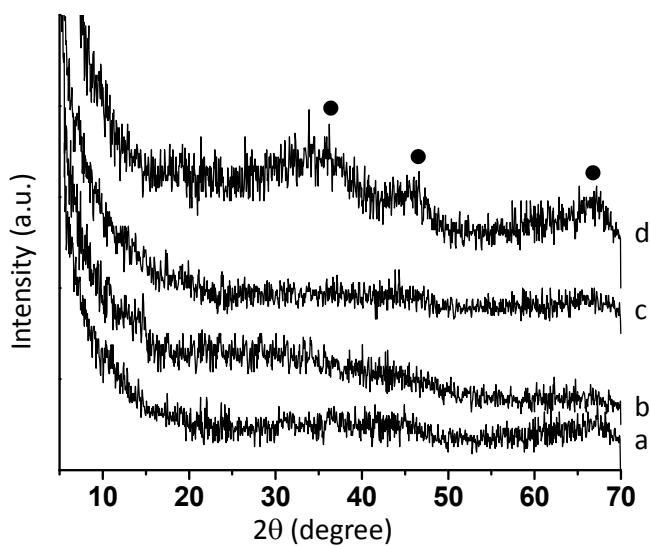

Supplement: c3ra22793f.pdf [file c3ra22793f.pdf]
